# Supplementary material for: Enhanced Photocatalytic Degradation of P-Chlorophenol by ZnIn2S4 Nanoflowers Modified with Carbon Quantum Dots
Source: MDPI journal article supplement (doi:10.3390/catal12121545), 2022-12-01
Supplement: s1 [file s1]

## Supporting Information

Enhanced photocatalytic degradation of p-chlorophenol by ZnIn<sub>2</sub>S<sub>4</sub> nanoflowers modified with carbon quantum dots

Jinli Qiu <sup>1</sup>, Quan Liu <sup>2</sup>, Yixing Qiu <sup>2</sup>, Fuqiang Liu <sup>2,\*</sup> and Fenghe wang <sup>1</sup>

*1 School of the Environment, Nanjing Normal University, Nanjing 210023, China*

*2 School of the Environment, Nanjing University, Nanjing 210023, China*

*\* Corresponding author. E-mail address: lfq@nju.edu.cn*

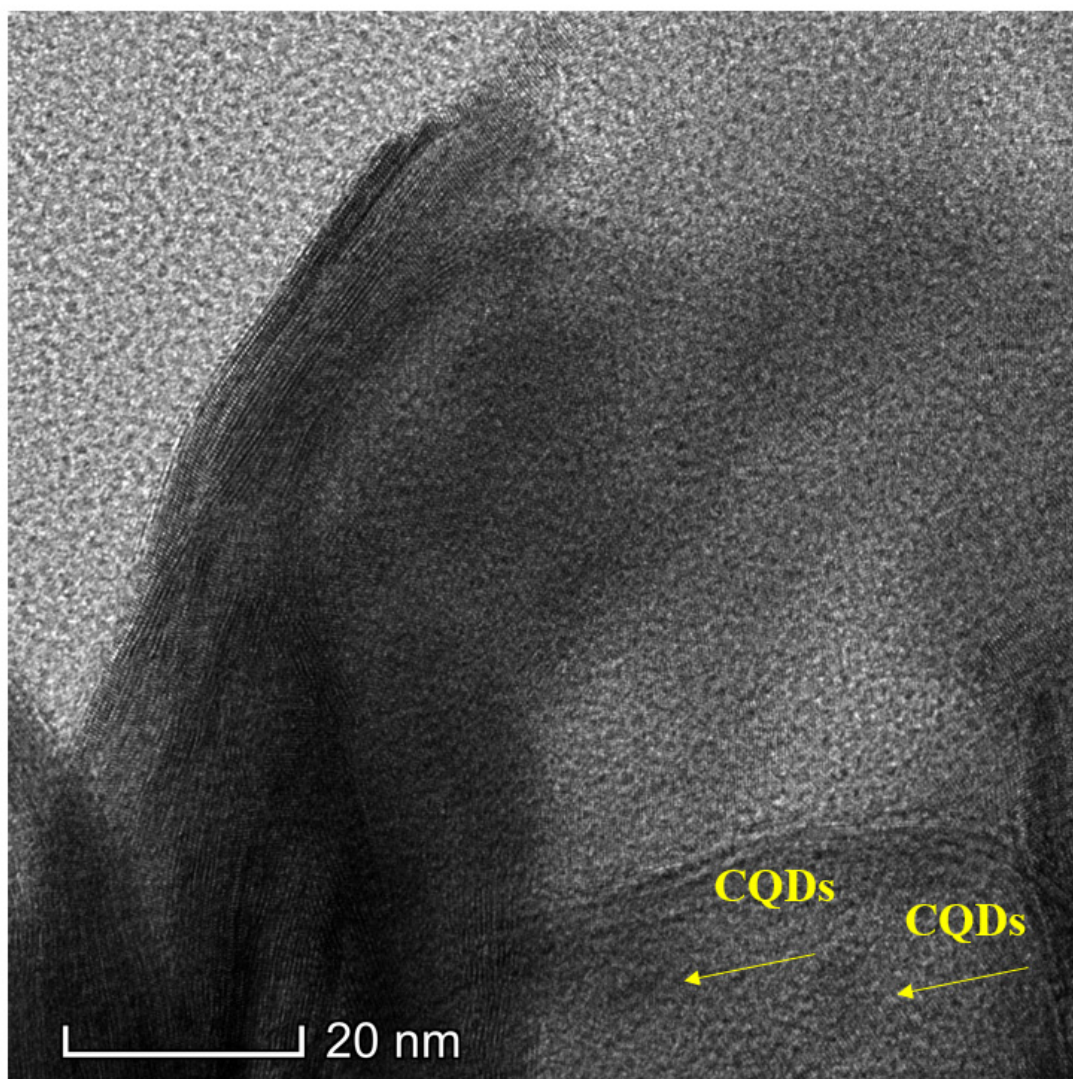

**Figure S1.** The HRTEM image of CQDs/ZnIn<sub>2</sub>S<sub>4</sub>-2.

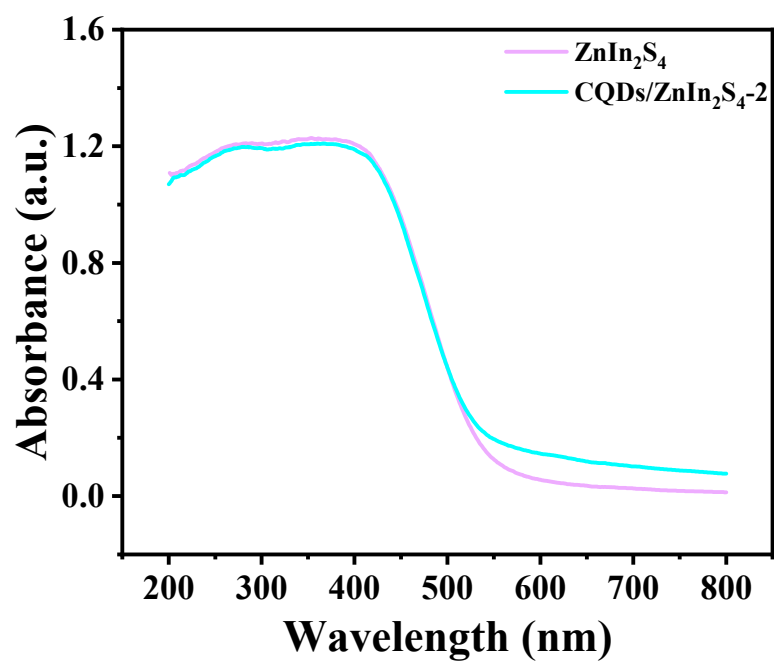

**Figure S2.** UV-vis absorption spectra of ZnIn<sub>2</sub>S<sub>4</sub> and CQDs/ZnIn<sub>2</sub>S<sub>4</sub>-2.

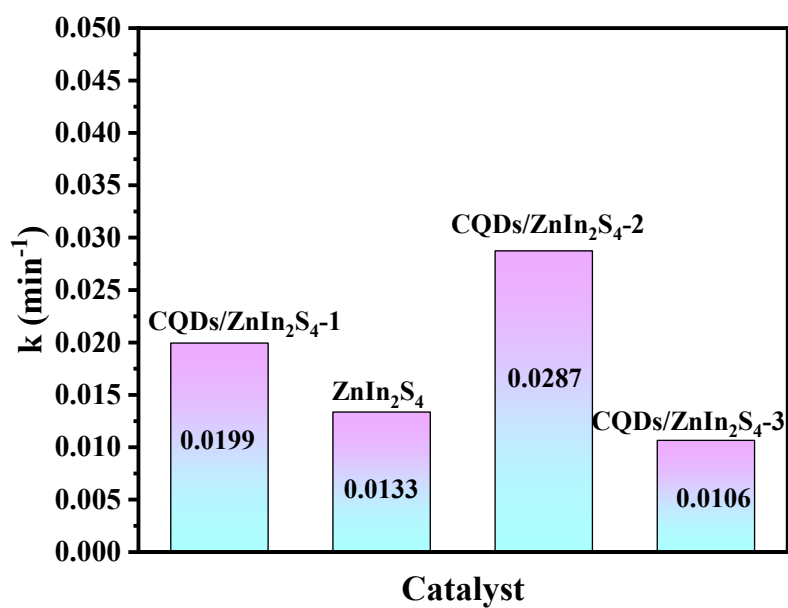

**Figure S3.** The pseudo-first-order reaction kinetics.

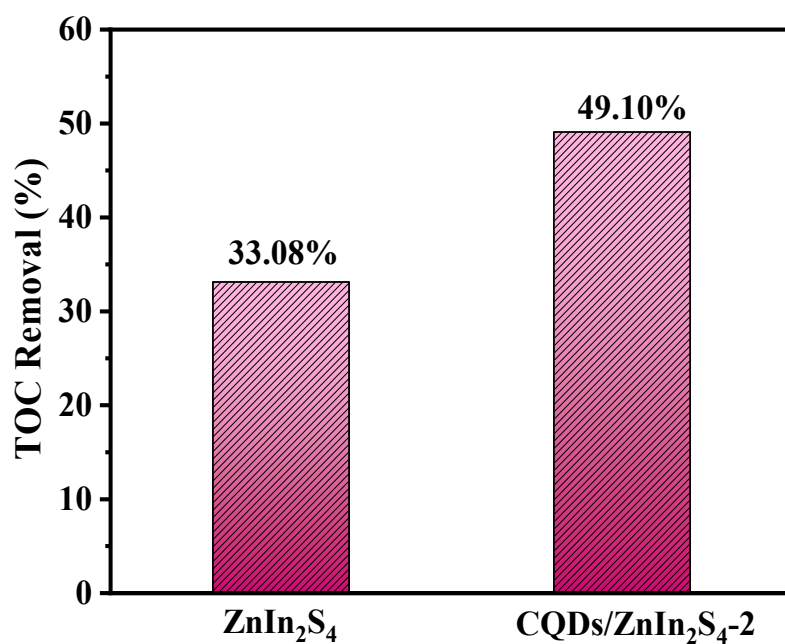

**Figure S4.** TOC removal efficiency of 4-CP by ZnIn<sub>2</sub>S<sub>4</sub> and CQDs/ZnIn<sub>2</sub>S<sub>4</sub>-2.

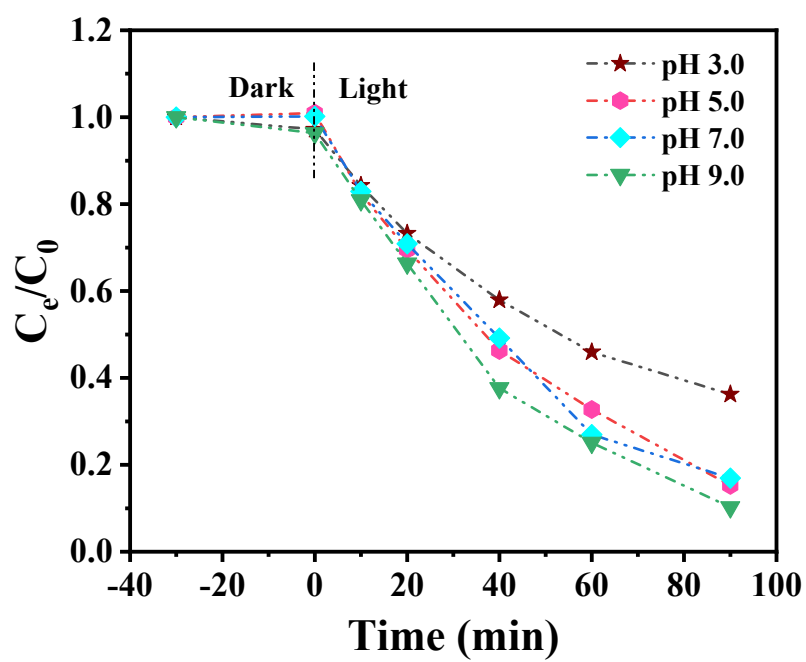

**Figure S5.** Effect of initial pH value for 4-CP degradation on CQDs/ZnIn<sub>2</sub>S<sub>4</sub>-2.

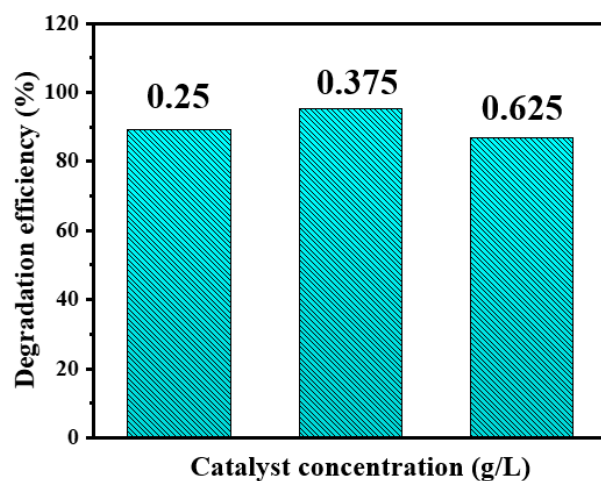

**Figure S6.** Effect of catalyst concentration on 4-CP degradation.

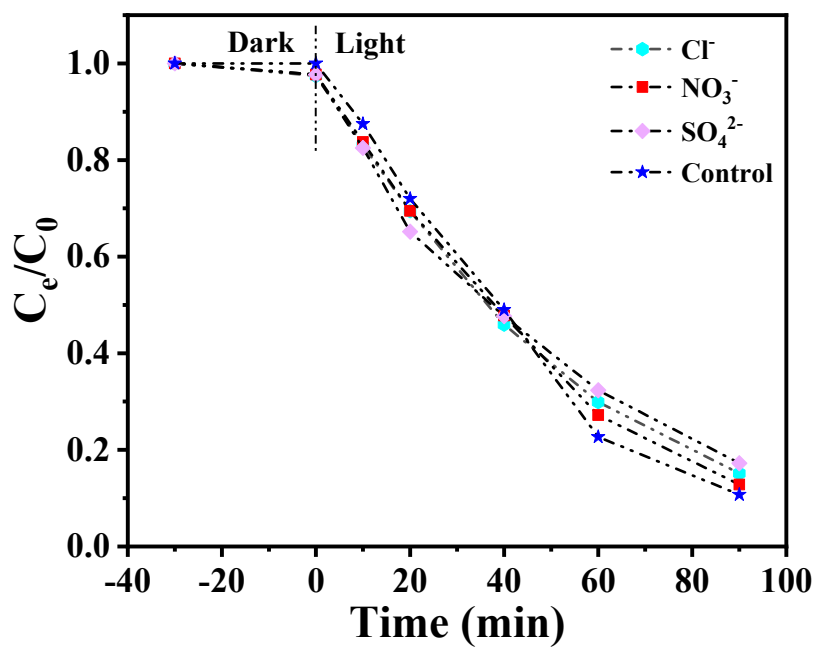

**Figure S7.** Effect of inorganic anions for 4-CP degradation on CQDs/ZnIn<sub>2</sub>S<sub>4</sub>-2.

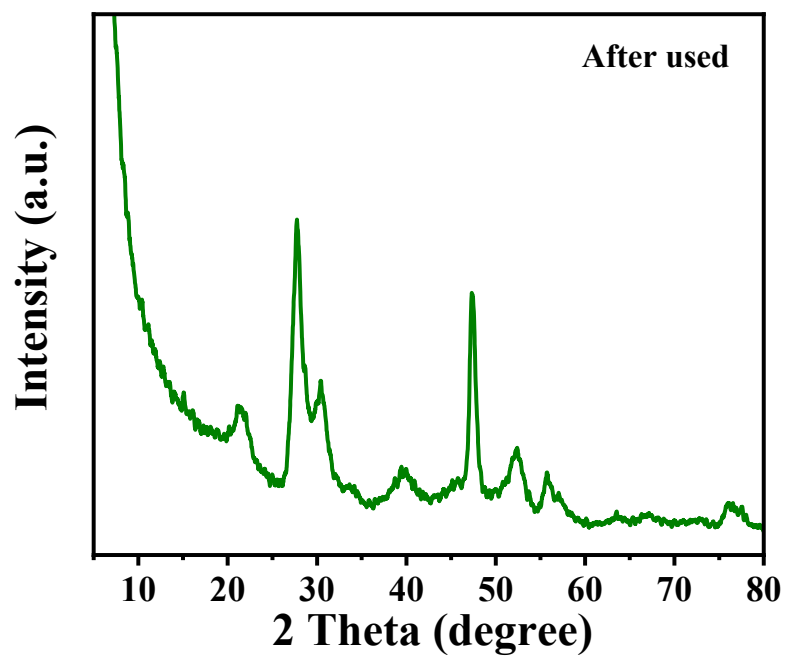

**Figure S8.** XRD pattern of CQDs/ZnIn<sub>2</sub>S<sub>4</sub>-2 after used.

**Table S1.** Comparison of 4-CP degradation performance of this work and reported photocatalysts.

| Photocatalysts                                     | Condition |              |         |             |            |
|----------------------------------------------------|-----------|--------------|---------|-------------|------------|
|                                                    | Dosage    | 4-CP Content | Time    | Degradation | References |
| g-C <sub>3</sub> N <sub>4</sub> /BiOI              | 100 mg    | 100 ppm/L    | 180 min | 22%         | [1]        |
| BiVO <sub>4</sub> /g-C <sub>3</sub> N <sub>4</sub> | 10 mg     | 0.1 ppm      | 100 min | 89%         | [2]        |
| g-C <sub>3</sub> N <sub>4</sub> /ZnO               | 100 mg    | 0.1mmol/L    | 80 min  | 100%        | [3]        |
| g-C <sub>3</sub> N <sub>4</sub> /PTCDI-Br          | 50 mg     | 5 ppm        | 60 min  | 100%        | [4]        |
| YFeO <sub>3</sub> /g-C <sub>3</sub> N <sub>4</sub> | 50 mg     | 0.01mmol     | 300 min | 38%         | [5]        |
| CQDs/ZnIn <sub>2</sub> S <sub>4</sub> -2           | 10 mg     | 10 ppm       | 90 min  | 89.8%       | This work  |

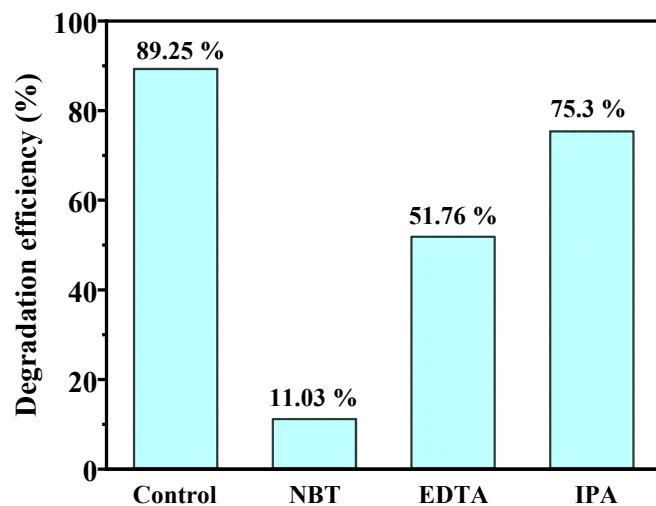

**Figure S9.** Trapping experiment of active species for photocatalytic degradation of 4-CP.

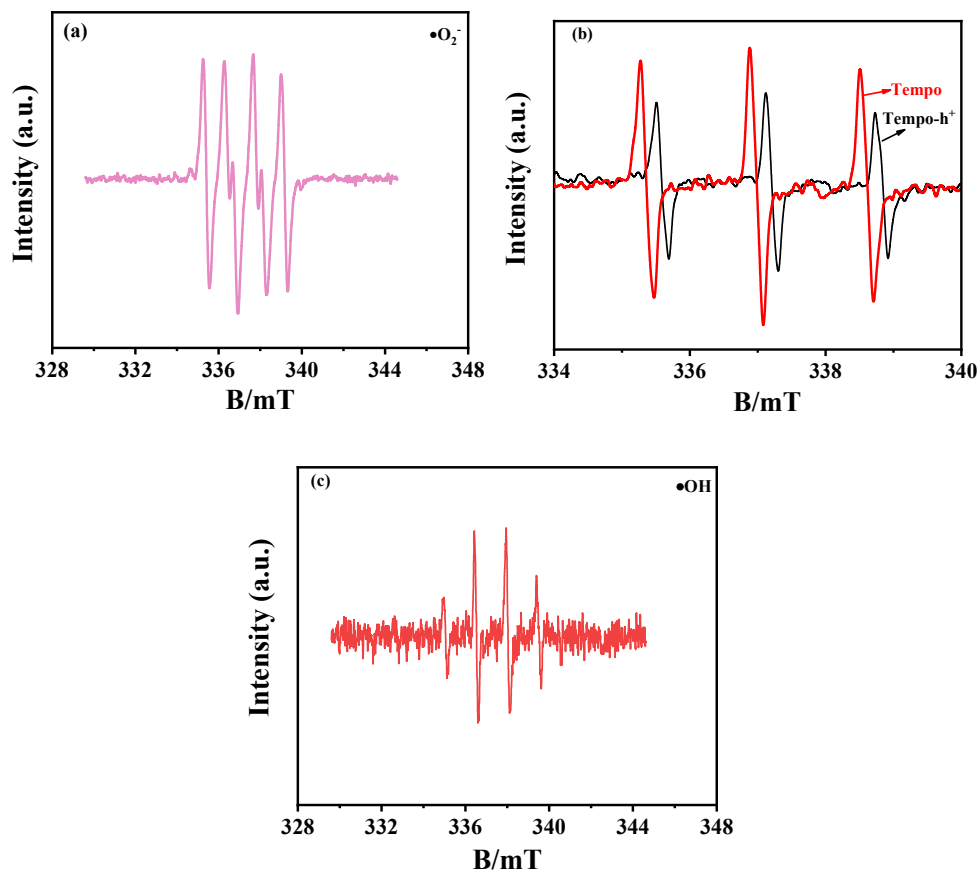

**Figure S10.** EPR spectra of CQDs/ $\text{ZnIn}_2\text{S}_4$ -2 in methanol dispersion for DMPO- $\bullet\text{O}_2^-$  (a), water dispersion for DMPO- $\bullet\text{OH}$  (c) and TEMPO- $\text{h}^+$  (b) under Xe lamp irradiation.

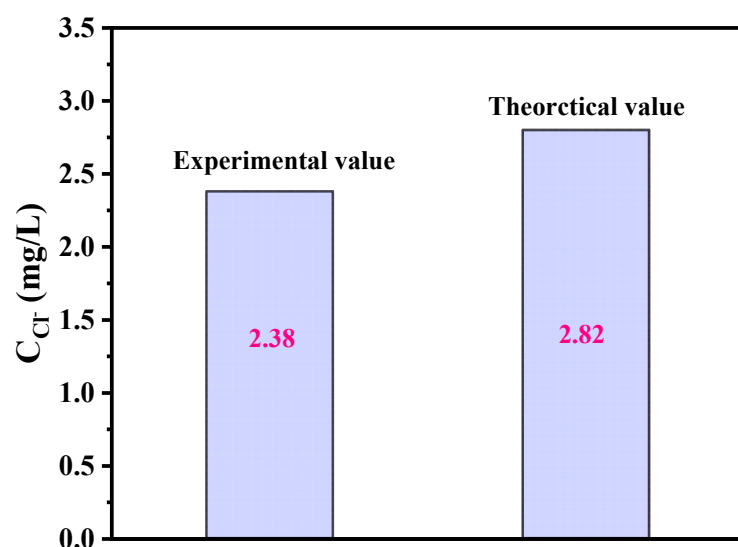

Figure S11.  $Cl^-$  concentration of 4-CP.

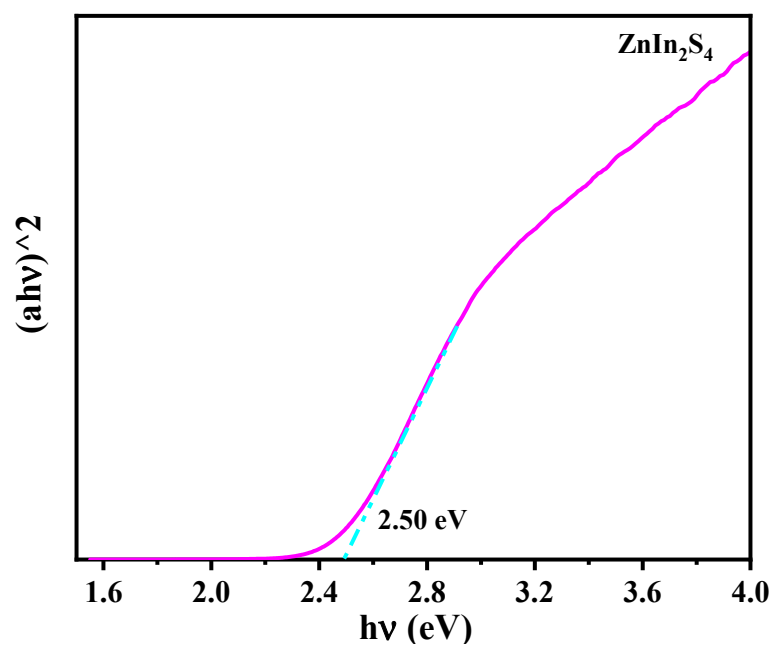

Figure S12. The band gap of  $ZnIn_2S_4$ .



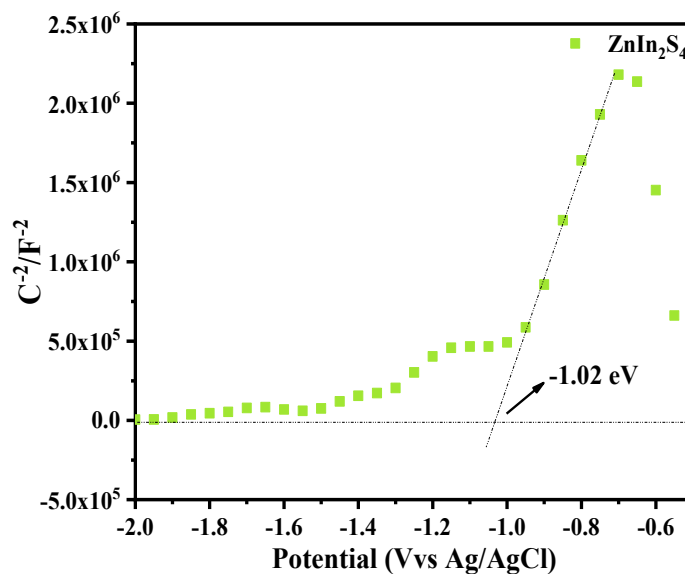

**Figure S13.** Mott-Schottky plot of  $\text{ZnIn}_2\text{S}_4$ .

## References

- [1] J. Di, J. Xia, S. Yin, H. Xu, L.i. Xu, Y. Xu, M. He, H. Li, Preparation of sphere-like  $\text{g-C}_3\text{N}_4/\text{BiOI}$  photocatalysts via a reactable ionic liquid for visible-light-driven photocatalytic degradation of pollutants, *J. Mater. Chem. A* 2 (15) (2014) 5340.
- [2] J. Wang, Y.i. Xia, H. Zhao, G. Wang, L. Xiang, J. Xu, S. Komarneni, Oxygen defectsmediated Z-scheme charge separation in  $\text{g-C}_3\text{N}_4/\text{ZnO}$  photocatalysts for enhanced visible-light degradation of 4-chlorophenol and hydrogen evolution, *Appl. Catal. B: Environ.* 206 (2017) 406–416.
- [3] J. Wang, Y.i. Xia, H. Zhao, G. Wang, L. Xiang, J. Xu, S. Komarneni, Oxygen defectsmediated Z-scheme charge separation in  $\text{g-C}_3\text{N}_4/\text{ZnO}$  photocatalysts for enhanced visible-light degradation of 4-chlorophenol and hydrogen evolution, *Appl. Catal. B: Environ.* 206 (2017) 406–416.
- [4] J. Liu, D.D. Han, P.J. Chen, L.P. Zhai, Y.J. Wang, W.H. Chen, L.W. Mi, L.P. Yang, Positive roles of Br in  $\text{g-C}_3\text{N}_4/\text{PTCDI-Br}$  heterojunction for photocatalytic degrading chlorophenols, *Chem. Eng. J.* 418 (2021) 129492.
- [5] M. Ismael, E. Elhaddad, D.H. Taffa, M. Wark, Solid state route for synthesis of  $\text{YFeO}_3/\text{g-C}_3\text{N}_4$  composites and its visible light activity for degradation of organic pollutants, *Catal. Today* 313 (2018) 47–54.
